# Supplementary material for: Possible Role of High-Molecular-Weight Salivary Proteins in Astringency Development
Source: MDPI journal article supplement (doi:10.3390/foods13060862), 2024-03-13
Supplement: s1 [file s1]

**Table S1.** Flavan-3-ol composition (%) of the seed extract employed in the study.

| Non-galloylated |        |         |          |           |       | mDP<br>2.09 |
|-----------------|--------|---------|----------|-----------|-------|-------------|
| Monomers        | Dimers | Trimers | Tetrames | Pentamers | Total |             |
| 8.64            | 64.66  | 13.29   | 1.10     | 0.29      | 87.98 |             |
| Galloylated     |        |         |          |           |       |             |
| Monomers        | Dimers | Trimers | Tetrames | Pentamers | Total |             |
| ---             | 11.30  | 0.55    | 0.17     | ---       | 12.02 |             |

mDP: medium degree of polymerization

**Table S2.** Molecular weight (MW), total amino acids content and percentages of hydrophobic, polar, acid, basic and aromatic residues of each HMW<sub>SP</sub> according to UniProt database [43].

| HMW <sub>SP</sub>                                    | MW      | Total Amino acids | Hydrophobic residues | Polar residues | Acid residues | Basic residues | Aromatic residues |
|------------------------------------------------------|---------|-------------------|----------------------|----------------|---------------|----------------|-------------------|
| <b><math>\alpha</math>-Amylase</b> from human saliva | ~58kDa  | 496               | 39.3%                | 24%            | 11.1%         | 12.7%          | 12.9%             |
| <b>Albumin</b> from human serum                      | ~66 kDa | 585               | 36.6%                | 21.2%          | 16.8%         | 16.9%          | 8.5%              |
| <b>Mucin</b> from bovine submaxillary glands         | ~58kDa  | 558               | 45.7%                | 37.8%          | 4.5%          | 7.3%           | 4.7%              |

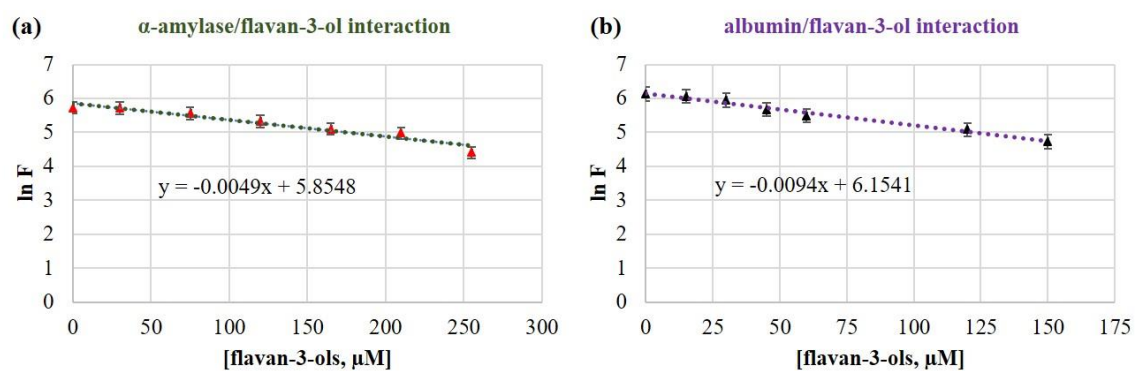

**Figure S1.** Modified Stern-Volmer plot describing tryptophan quenching of HMW<sub>SP</sub> by increasing concentrations of seed flavan-3-ols: (a)  $\alpha$ -amylase (3  $\mu\text{M}$ ); (b) albumin (3  $\mu\text{M}$ ). The  $\lambda_{\text{em}}$  maximum was recorded at ~350 nm.

**Table S3.** Stern-Volmer Quenching Constant ( $K_{sv}$ ) and Bimolecular Quenching Constant ( $K_q$ ) for the HMW<sub>sp</sub>:flavan-3-ol interactions.

| HMW <sub>sp</sub> | $\tau_\theta$ (s)       | $K_{sv}$ (M <sup>-1</sup> ) | $K_q$ (M <sup>-1</sup> s <sup>-1</sup> ) |
|-------------------|-------------------------|-----------------------------|------------------------------------------|
| $\alpha$ -amylase | 2.97 x 10 <sup>-9</sup> | 4.90 x 10 <sup>3*</sup>     | 1.65 x 10 <sup>12**</sup>                |
| albumin           | 6.38 x 10 <sup>-9</sup> | 9.40 x 10 <sup>3*</sup>     | 1.88 x 10 <sup>12**</sup>                |
| mucin             | 3.68 x 10 <sup>-9</sup> | 3.33 x 10 <sup>4</sup>      | 9.06 x 10 <sup>12</sup>                  |

\*These values correspond to the Apparent Static Quenching Constant  $K_{app}$  (M<sup>-1</sup>)

\*\* These values correspond to the Apparent Bimolecular Quenching Constant  $K_q^{app}$  (M<sup>-1</sup> s<sup>-1</sup>)
